# Supplementary material
Source: publisher figshare collection journal article supplement (https://wiley.figshare.com/ndownloader/files/5617272)
Supplement: Supplementary file 1 [file 5617272]

Ecological Archives E091-228-A1


### *Ecological Archives* E091-228-A1

### E. L. Aronson and B. R. Helliker. 2010. Methane flux in non-wetland soils in response to nitrogen addition: a meta-analysis. *Ecology* 91:3242–3251.

Appendix A. A list of papers from which data were extracted for this metadata analysis.

Ambus, P., and G. P. Robertson. 2006. The effect of increased n deposition on nitrous oxide, methane and carbon dioxide fluxes from unmanaged forest and grassland communities in Michigan. Biogeochemistry 79:315–337.

Bradford, M. A., P. A. Wookey, P. Ineson, and H. M. Lappin-Scott. 2001. Controlling factors and effects of chronic nitrogen and sulphur deposition on methane oxidation in a temperate forest soil. Soil Biology and Biochemistry 33:93–102.

Castro, M. S., W. T. Peterjohn, J. M. Melillo, P. A. Steudler, H. L. Gholz, and D. Lewis. 1994. Effects of nitrogen-fertilization on the fluxes of N2O, CH4, and CO2 from soils in a Florida slash pine plantation. Canadian Journal of Forest Research-Revue Canadienne De Recherche Forestiere 24:9–13.

Christensen, T. R., A. Michelsen, and S. Jonasson. 1999. Exchange of CH4 and N2O in a subarctic heath soil: effects of inorganic N and P and amino acid addition. Soil Biology and Biochemistry 31:637–641.

Christensen, T. R., A. Michelsen, S. Jonasson, and I. K. Schmidt. 1997. Carbon dioxide and methane exchange of a subarctic heath in response to climate change related environmental manipulations. Oikos 79:34–44.

Chu, H. Y., Y. Hosen, and K. Yagi. 2007. NO, N2O, CH4 and fluxes in winter barley field of Japanese Andisol as affected by N fertilizer management. Soil Biology and Biochemistry 39:330–339.

Delgado, J. A., A. R. Mosier, R. H. Follett, R. F. Follett, D. G. Westfall, L. K. Klemedtsson, and J. Vermeulen. 1996. Effects of N management on N2O and CH4 fluxes and N-15 - Recovery in an irrigated mountain meadow. Nutrient Cycling in Agroecosystems 46:127–134.

Ding, W. X., Z. C. Cai, and H. Tsuruta. 2004. Cultivation, nitrogen fertilization, and set-aside effects on methane uptake in a drained marsh soil in Northeast China. Global Change Biology 10:1801–1809.

Dorsch, P., A. Palojarvi, and S. Mommertz. 2004. Overwinter greenhouse gas fluxes in two contrasting agricultural habitats. Nutrient Cycling in Agroecosystems 70:117–133.

Gattinger, A., M. G. Hoefle, M. Schloter, A. Embacher, F. Bohme, J. C. Munch, and M. Labrenz. 2007. Traditional cattle manure application determines abundance, diversity and activity of methanogenic Archaea in arable European soil. Environmental Microbiology 9:612–624.

Gulledge, J., A. P. Doyle, and J. P. Schimel. 1997. Different NH4+-inhibition patterns of soil CH4 consumption: A result of distinct CH4-oxidizer populations across sites? Soil Biology and Biochemistry 29:13–21.

Hansen, S., J. E. Maehlum, and L. R. Bakken. 1993. N2O and CH4 fluxes in soil influenced by fertilization and tractor traffic. Soil Biology and Biochemistry 25:621–630.

Hu, R. G., R. Hatano, K. Kusa, and T. Sawamoto. 2002. Effect of nitrogen fertilization on methane flux in a structured clay soil cultivated with onion in central Hokkaido, Japan. Soil Science and Plant Nutrition 48:797–804.

Jumadi, O., Y. Hala, A. Muis, A. Ali, M. Palennari, K. Yagi, and K. Inubushi. 2008. Influences of chemical fertilizers and a nitrification inhibitor on greenhouse gas fluxes in a corn (Zea mays L.) field in Indonesia. Microbes and Environments 23:29–34.

Klemedtsson, A. K., and L. Klemedtsson. 1997. Methane uptake in Swedish forest soil in relation to liming and extra N-deposition. Biology and Fertility of Soils 25:296–301.

Kruse, C. W., and N. Iversen. 1995. Effect of plant succession, plowing, and fertilization on the microbiological oxidation of atmospheric methane in a heathland soil. Fems Microbiology Ecology 18:121–128.

Maljanen, M., H. Jokinen, A. Saari, R. Strommer, and P. J. Martikainen. 2006. Methane and nitrous oxide fluxes, and carbon dioxide production in boreal forest soil fertilized with wood ash and nitrogen. Soil Use and Management 22:151–157.

Maljanen, M., A. Liikanen, J. Silvola, and P. J. Martikainen. 2003. Methane fluxes on agricultural and forested boreal organic soils. Soil Use and Management 19:73–79.

Mosier, A., D. Schimel, D. Valentine, K. Bronson, and W. Parton. 1991. Methane and nitrous-oxide fluxes in native, fertilized and cultivated grasslands. Nature 350:330–332.

Mosier, A. R., and J. A. Delgado. 1997. Methane and nitrous oxide fluxes in grasslands in western Puerto Rico. Chemosphere 35:2059–2082.

Mosier, A. R., J. A. Delgado, V. L. Cochran, D. W. Valentine, and W. J. Parton. 1997. Impact of agriculture on soil consumption of atmospheric CH4 and a comparison of CH4 and N2O flux in subarctic, temperate and tropical grasslands. Nutrient Cycling In Agroecosystems 49:71–83.

Mosier, A. R., J. A. Delgado, and M. Keller. 1998. Methane and nitrous oxide fluxes in an acid Oxisol in western Puerto Rico: Effects of tillage, liming and fertilization. Soil Biology and Biochemistry 30:2087–2098.

Neff, J. C., W. D. Bowman, E. A. Holland, M. C. Fisk, and S. K. Schmidt. 1994. Fluxes of nitrous-oxide and methane from nitrogen-amended soils in a Colorado alpine ecosystem. Biogeochemistry 27:23–33.

Papen, H., M. Daum, R. Steinkamp, and K. Butterbach-Bahl. 2001. N2O and CH4-fluxes from soils of a N-limited and N-fertilized spruce forest ecosystem of the temperate zone. Journal of Applied Botany–Angewandte Botanik 75:159–163.

Saari, A., A. Smolander, and P. J. Martikainen. 2004. Methane consumption in a frequently nitrogen-fertilized and limed spruce forest soil after clear-cutting. Soil Use and Management 20:65–73.

Simona, C., D. P. R. Ariangelo, G. John, N. Nina, M. Ruben, and S. J. Jose. 2004. Nitrous oxide and methane fluxes from soils of the Orinoco savanna under different land uses. Global Change Biology 10:1947–1960.

Sitaula, B. K., L. R. Bakken, and G. Abrahamsen. 1995. CH4 uptake by temperate forest soil – effect of N input and soil acidification. Soil Biology and Biochemistry 27:871–880.

Sitaula, B. K., S. Hansen, J. I. B. Sitaula, and L. R. Bakken. 2000. Methane oxidation potentials and fluxes in agricultural soil: Effects of fertilisation and soil compaction. Biogeochemistry 48:323–339.

Smolander, A., A. Kurka, V. Kitunen, and E. Malkonen. 1994. Microbial biomass C and N, and respiratory activity in soil of repeatedly limed and N-fertilized and P-fertilized Norway Spruce stands. Soil Biology and Biochemistry 26:957–962.

Steinkamp, R., K. Butterbach-Bahl, and H. Papen. 2001. Methane oxidation by soils of an N limited and N fertilized spruce forest in the Black Forest, Germany. Soil Biology and Biochemistry 33:145–153.

Steudler, P. A., R. D. Bowden, J. M. Melillo, and J. D. Aber. 1989. Influence of nitrogen-fertilization on methane uptake in temperate forest soils. Nature 341:314–316.

Suwanwaree, P., and G. P. Robertson. 2005. Methane oxidation in forest, successional, and no-till agricultural ecosystems: Effects of nitrogen and soil disturbance. Soil Science Society of America Journal 69:1722–1729.

Zhang, W., J. M. Mo, G. Y. Zhou, P. Gundersen, Y. T. Fang, X. K. Lu, T. Zhang, and S. F. Dong. 2008. Methane uptake responses to nitrogen deposition in three tropical forests in southern China. Journal of Geophysical Research-Atmospheres 113.

---


[Back to E091-228]
